# Supplementary material
Source: PubMed Central journal article supplement (PMC6153288)
Supplement: supp_RA118.003913_138063_2_supp_177698_pcs976.pdf [file supp_RA118.003913_138063_2_supp_177698_pcs976.pdf]

## Supplementary Information

### Supplementary Figure 1

#### Expression of factors in BMP pathway during reprogramming

(A) The expression of factors in BMP pathway (kegg: 04350) during reprogramming were summarized basing on previous reported microarray dataset (GSE21757).

(B-C) The abilities of BMP4 to up-regulate *Msx1/3* were determined by qPCR on Day 4 in both in MEFs and during reprogramming.

All experiments were repeated for at least five times. One-way ANOVA with Dunnett's post-hoc test was used.

**Figure S1**

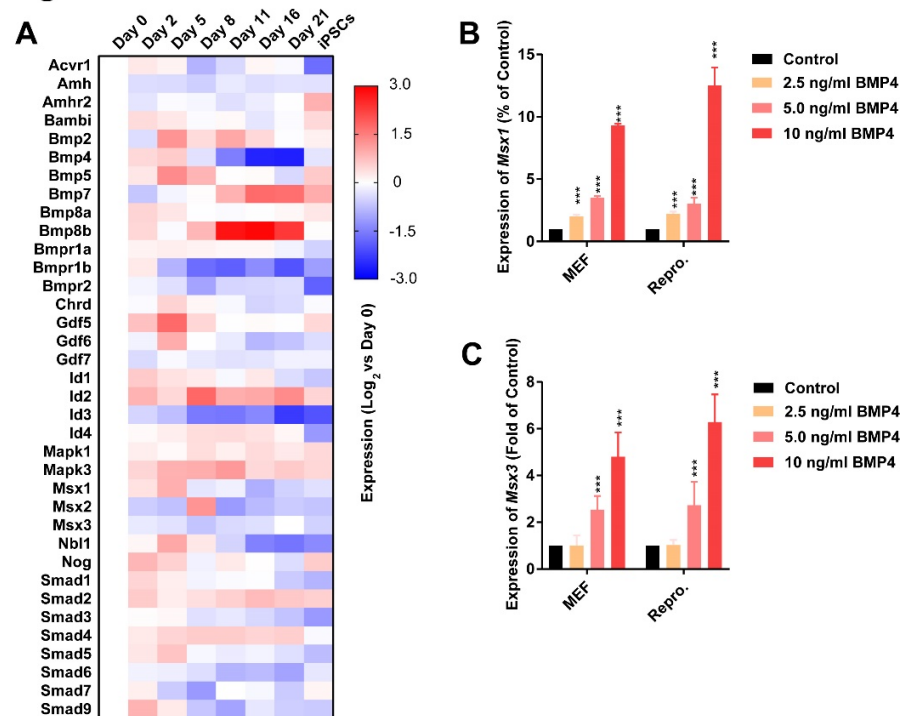

## Supplementary Figure 2

### GFP<sup>+</sup> colonies generated with *Msx2* were iPSCs

GFP<sup>+</sup> colonies generated with *Msx2* were picked and cultured in mES medium.

(A) Exogenous expression of four Yamanaka factors were determined with qPCR.

(B) Endogenous expression of *Klf4*, *Sox2*, *Oct4*, and *Nanog* were determined with qPCR.

(C) The protein levels of SSEA1, Oct4, and Nanog were determined with immune-fluorescence.

(D) Karyotypes of GFP<sup>+</sup> colonies were determined

(E) DNA methylation on the promoters of *Oct4* and *Nanog* were determined

(F) GFP<sup>+</sup> colonies were able to contribute to chimera.

All experiments except chimera were repeated for at least five times. One-way ANOVA with Dunnett's post-hoc test was used.

### Figure S2

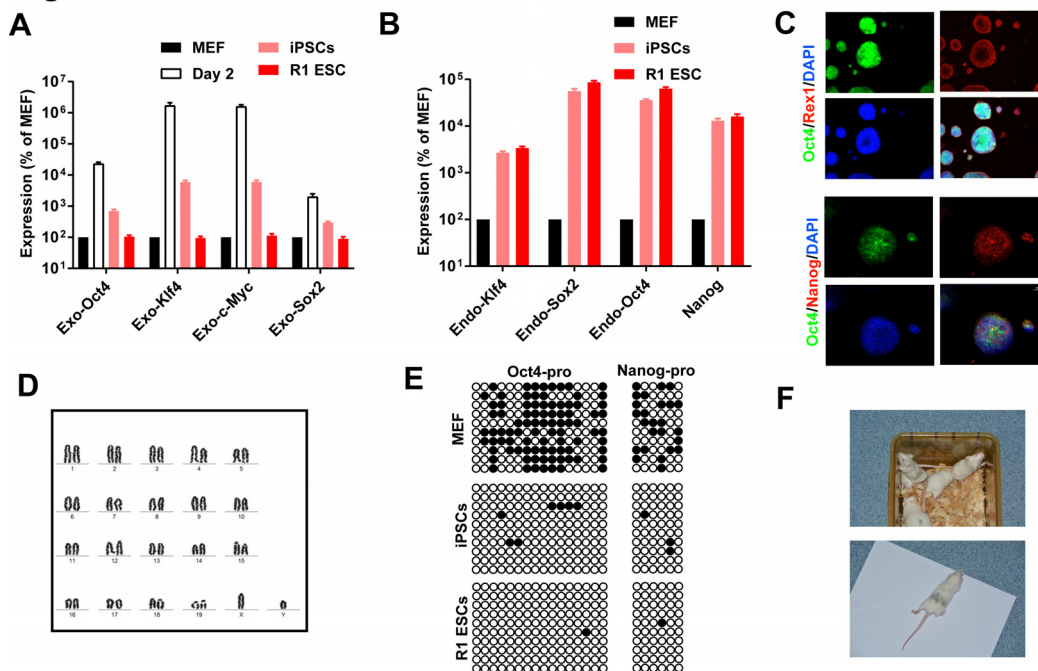

### Supplementary Figure 3

#### *Msx2* did not regulate miR-205 and miR-200 family

The abilities of BMP4, *Smad1* and *Msx2* to affect the expression of miR-205, miR-200a/b/c were determined on four days after virus delivery.

All experiments were repeated for at least five times. One-way ANOVA with Dunnett's post-hoc test was used.

**Figure S3**

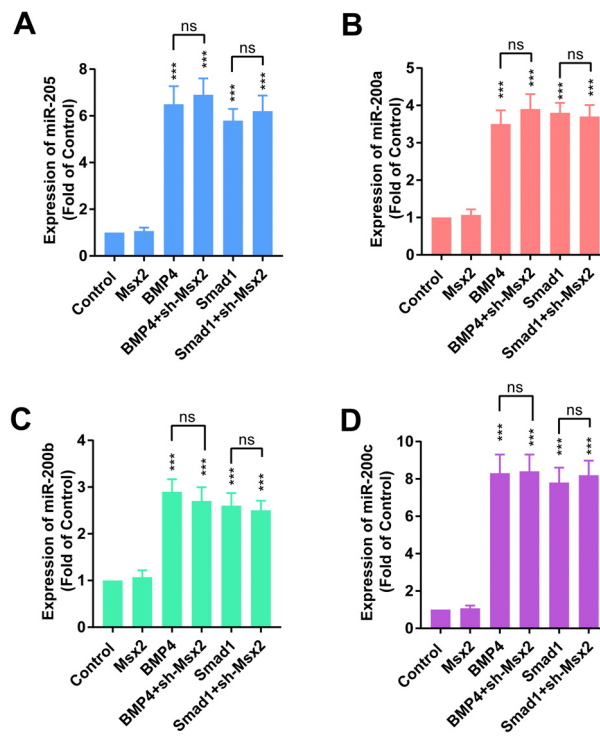

## Supplementary Figure 4

### Msx1 and Msx3 have less abilities to up-regulate the four targets

*Msx1*, *Msx2* or *Msx3* was over-expressed during reprogramming. The expression of *Cdh1*, *Gata3*, *Nanog*, and *Sall4* were determined on Day 4.

All experiments were repeated for at least five times. One-way ANOVA with Dunnett's post-hoc test was used.

Figure S4

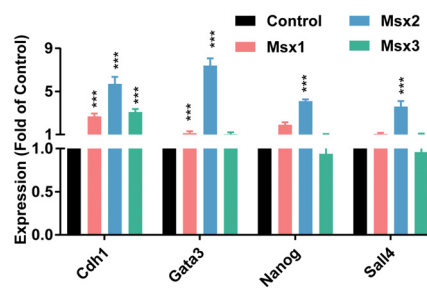

## Supplementary Figure 5

### *Oct4*, *c-Myc*, and *Sox2* did not potentiate the functions of *Msx2*

*Oct4*, *c-Myc*, and *Sox2* were over-expressed alone or together with *Msx2* in MEFs. The expression of *Cdh1*, *Gata3*, *Nanog*, and *Sall4* were determined on Day 4. The abilities of *Msx2* to up-regulate these genes were calculated by performing comparisons indicated in (D).

All experiments were repeated for at least five times. One-way ANOVA with Dunnett's post-hoc test was used.

### Figure S5

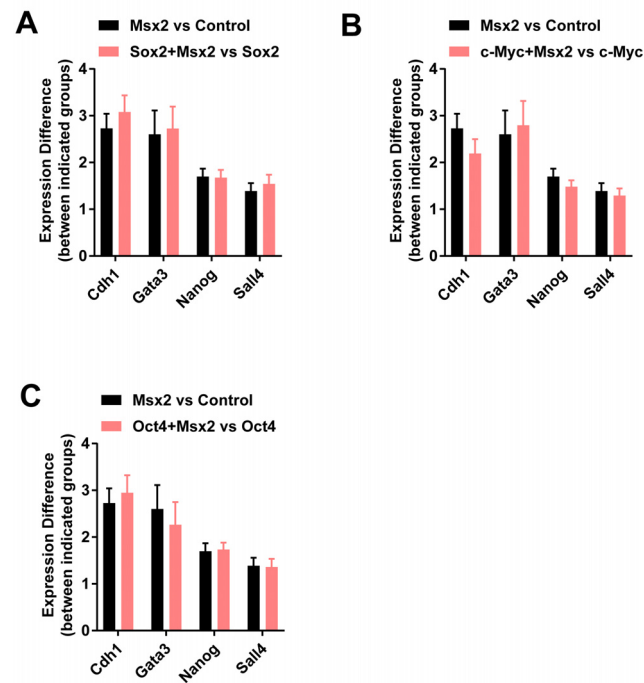

## Supplementary Figure 6

### ***Msx2* can replace *Oct4*, *Klf4*, or *Sox2* to induce reprogramming**

*Msx2* or *Gata3* were over-expressed with *Klf4*, *c-Myc*, and *Sox2* (KMS), *Oct4*, *c-Myc*, and *Sox2* (OMS), or *Oct4*, *Klf4*, and *c-Myc* (OKM). GFP<sup>+</sup> colonies were counted on Day 15.

All experiments were repeated for at least five times. One-way ANOVA with Dunnett's post-hoc test was used.

**Figure S6**

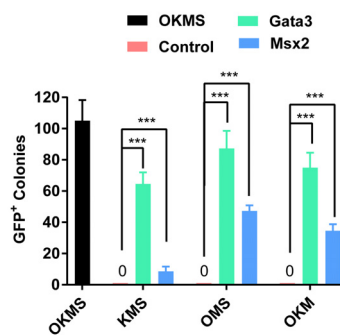

## Supplementary Table S1

### **The current RNA-seq results**

RNA-seq were performed on Day 4 and 8 during reprogramming with the expression of *Msx2* modulated.

## Supplementary Table S2

### **The material used in the current studies**

As title
